# Supplementary material for: Development of a continuous synthesis process for carbamazepine using validated in-line Raman spectroscopy and kinetic modelling for disturbance simulation
Source: Royal Society of Chemistry journal article supplement (doi:10.1039/d2re00476c), 2023-01-01

## Supplementary Information

### Abbreviations

CBZ: Carbamazepine (5H-dibenzo[b,f]azepine-5-carboxamide)

CBZ-A: 10,11-Dihydro-5H-dibenz[b,f]azepine-5-carboxamide

CS: Continuous Synthesis

CSTR: Continuous Stirred Tank Reactor

FDA: Food and Drug Administration

HPLC: High Performance Liquid Chromatography

ISB: Iminostilbene (5H-Dibenz[b,f]azepine)

PAT: Process Analytical Technologies

RBF: Round Bottom Flask

WHO: World Health Organization

### HPLC Method and Method Validation

Instrument: Agilent 1260

Analytical Column: Waters Cortex C18, 2.7 µm particle size, 2.1 x 100mm

Guard Column: Waters Cortex C18, 2.7 µm particle size, 2.1 x 5 mm

Detector: Diode array detector 230 nm

Injection Volume: 2 µL

Flow Rate: 0.4 mL/min

Column Temperature: 30 °C

Stop Time: 24 min

**Table S1: HPLC Method Gradient**

| Time (min) | Milli-Q water (%) | Methanol (%) | Acetonitrile (%) |
|------------|-------------------|--------------|------------------|
| 0          | 57                | 40           | 3                |
| 1          | 57                | 40           | 3                |
| 11         | 38                | 60           | 2                |
| 14         | 38                | 60           | 2                |
| 16.5       | 57                | 40           | 3                |

**Figure S1:** HPLC chromatogram of blank injection (a) and system suitability (b) at 10.0 µg/mL of CBZ, CBZ-A and ISB.

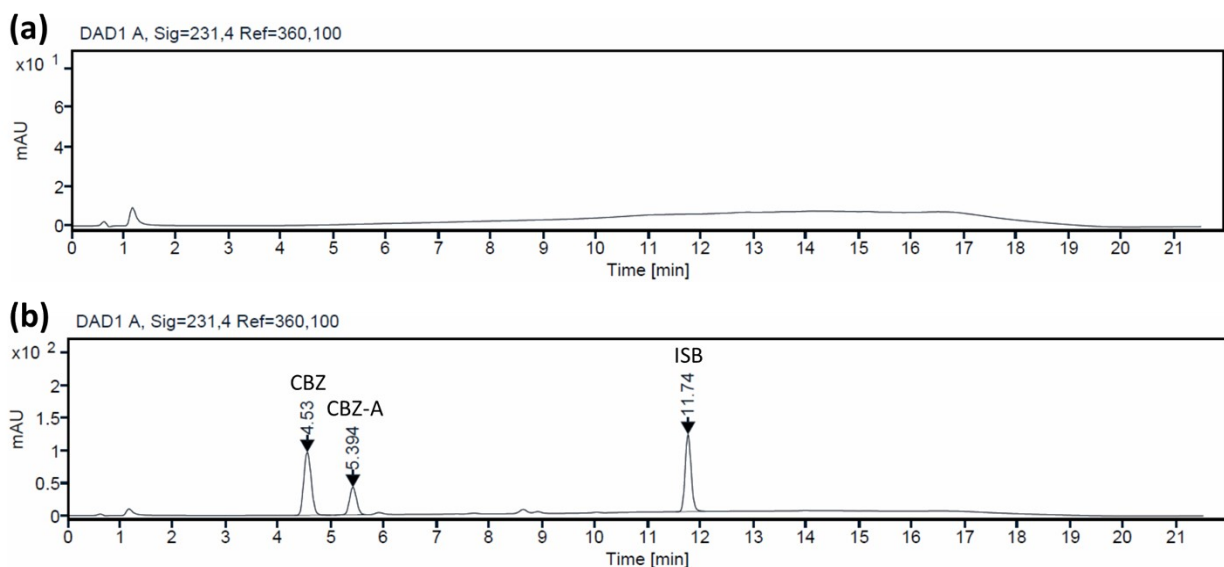

## Batch Kinetic Data

**Table S2:** CBZ in Solution Yield (%) of Batch Reaction Timepoints. HPLC measurements and fitted model predictions are shown.

| Time (sec) | 30°C |       | 40°C |       | 45°C |       | 50°C |       | 60°C |       | 70°C |       |
|------------|------|-------|------|-------|------|-------|------|-------|------|-------|------|-------|
|            | HPLC | Model |
| 30         | 4.2  | 1.9   | 7    | 3.1   | 6.4  | 3.9   | 7.2  | 4.9   | 9.6  | 7.4   | 10   | 10.7  |
| 60         | 8    | 3.7   | 9.7  | 6     | 10   | 7.5   | 10.8 | 9.3   | 14.4 | 13.7  | 17.7 | 19.2  |
| 90         | 9.5  | 5.5   | 17.7 | 8.8   | 12.9 | 10.8  | 14.8 | 13.3  | 19.3 | 19.1  | 25.1 | 26    |
| 120        | 17.2 | 7.2   | 15.1 | 11.3  | 15.4 | 13.9  | 17.6 | 16.9  | 25.5 | 23.8  | 31   | 31.6  |
| 300        | 20   | 16.2  | 26.7 | 24.1  | 28.6 | 28.6  | 33.4 | 33.3  | 42.7 | 42.7  | 50.3 | 51    |
| 600        | 28.6 | 27.8  | 39.4 | 38.4  | 42.3 | 43.8  | 48.8 | 48.9  | 57.3 | 57.4  | 62.4 | 63    |
| 900        | 35.5 | 36.5  | 47.4 | 47.9  | 51   | 53.1  | 57.1 | 57.7  | 64.4 | 64.4  | 66.5 | 67.6  |
| 1800       | 49.9 | 52.9  | 61.8 | 63.1  | 65   | 66.8  | 69.4 | 69.5  | 72.4 | 71.9  | 69.9 | 71    |
| 2700       | 58.6 | 62    | 69.3 | 70.1  | 71.5 | 72.5  | 74.7 | 73.9  | 74.8 | 73.8  | 70.5 | 71.5  |
| 3600       | 63.6 | 67.7  | 73.9 | 73.9  | 75.3 | 75.4  | 76.8 | 75.8  | 75.5 | 74.4  | 70.6 | 71.5  |
| 5400       | 70.9 | 74.3  | 80.3 | 77.7  | 78.9 | 77.9  | 79   | 77.3  | 76   | 74.6  | 70.7 | 71.5  |
| 7200       | 75.1 | 77.8  | 81   | 79.4  | 80.5 | 78.8  | 79.7 | 77.7  | 76   | 74.7  | 70.7 | 71.5  |

## Raman Method and Method Validation

**Table S3:** In-line Raman Method Validation procedure. The sample 'calibration curve 0' is for informational purposes and the model should be considered only semi-quantitative outside of the ranges ISB [0.50-2.50 mg/mL] and CBZ [0.70-7.50 mg/mL].

| Sample                     | ISB [mg/mL] | CBZ [mg/mL] | Spectra Collected |
|----------------------------|-------------|-------------|-------------------|
| Blank                      | 0           | 0           | 10                |
| System Suitability         | 0.75        | 1.25        | 10                |
| *Calibration Curve 0       | 0.25        | 0.4         | 1                 |
| Calibration Curve 1        | 0.5         | 0.7         | 1                 |
| Calibration Curve 2        | 0.75        | 1.25        | 1                 |
| Calibration Curve 3        | 1           | 2.5         | 1                 |
| Calibration Curve 4        | 1.5         | 4.5         | 1                 |
| Calibration Curve 5        | 2           | 6           | 1                 |
| Calibration Curve 6        | 2.5         | 7.5         | 1                 |
| Low-Level Quality Control  | 0.7         | 1           | 5                 |
| Mid-Level Quality Control  | 1.25        | 3.25        | 5                 |
| High-Level Quality Control | 2           | 6           | 5                 |

**Table S4:** Accuracy and precision of quality controls and system suitability during method validation.

| Samples                | Validation 1 | Validation 2 | Validation 3 |
|------------------------|--------------|--------------|--------------|
| ISB System Suitability | 98.3 ± 0.9%  | 102.3 ± 1.3% | 101.3 ± 0.5% |
| ISB Low-Level          | 99.1 ± 1.4%  | 99.8 ± 0.8%  | 102.4 ± 0.6% |
| ISB Mid-Level          | 98.2 ± 0.8 % | 99.7 ± 0.3%  | 98.7 ± 0.3%  |
| ISB High-Level         | 97.6 ± 0.5%  | 100.9 ± 0.4% | 100.8 ± 0.4% |
| CBZ System Suitability | 101.2 ± 0.9% | 105.1 ± 1.7% | 101.3 ± 1.6% |
| CBZ Low-Level          | 103.8 ± 2.1% | 104.2 ± 1.5% | 101.6 ± 1.7% |
| CBZ Mid-Level          | 97.1 ± 0.2%  | 102.0 ± 0.4% | 101.8 ± 0.6% |
| CBZ High-Level         | 98.7 ± 0.5%  | 101.0 ± 0.3% | 100.4 ± 0.3% |

**Table S5:** Intermediate repeatability results for quality control measurements over a period of 7 days.

| Quality Control Samples | Day 0        | Day 1        | Day 2        | Day 3        | Day 7        |
|-------------------------|--------------|--------------|--------------|--------------|--------------|
| ISB Low-Level           | 102.2 ± 0.6% | 104.6 ± 0.7% | 105.1 ± 0.7% | 103.2 ± 0.6% | 102.2 ± 0.4% |
| ISB Mid-Level           | 98.2 ± 0.3%  | 98.8 ± 1.1%  | 98.1 ± 0.3%  | 98.3 ± 0.5%  | 97.2 ± 0.6%  |
| ISB High-Level          | 98.1 ± 0.4%  | 100.0 ± 0.3% | 98.5 ± 0.4%  | 99.4 ± 0.2%  | 98.0 ± 0.5%  |
| CBZ Low-Level           | 100.5 ± 1.5% | 101.7 ± 2.5% | 102.4 ± 3.3% | 103.9 ± 1.9% | 102.1 ± 1.2% |
| CBZ Mid-Level           | 99.9 ± 0.6%  | 97.3 ± 0.7%  | 100.2 ± 0.8% | 100.6 ± 0.6% | 97.5 ± 0.6%  |
| CBZ High-Level          | 97.0 ± 0.3%  | 98.5 ± 0.5%  | 99.3 ± 0.3%  | 98.3 ± 0.5%  | 96.3 ± 0.7%  |

## Discretized Batch Equations

$$S1) [CBZ] = [CBZ]_0 + \lim_{\Delta t \rightarrow 0} \sum_{t=0}^t A_1 e^{-\frac{E_{A,1}}{8.314 \times T}} [ISB_i] [HOCN_i] \Delta t$$

$$S2) [ISB] = [ISB]_0 + \lim_{\Delta t \rightarrow 0} \sum_{t=0}^t -A_1 e^{-\frac{E_{A,1}}{8.314 \times T}} [ISB_i] [HOCN_i] \Delta t$$

$$S3) [KOCN] = [KOCN]_0 + \lim_{\Delta t \rightarrow 0} \sum_{t=0}^t \left\{ -A_1 e^{-\frac{E_{A,1}}{8.314 \times T}} [ISB_i] [HOCN_i] - A_2 e^{-\frac{E_{A,2}}{8.314 \times T}} [HOCN_i] \right\} \Delta t$$

## Discretized Continuous Equations

$$S4) [CBZ] = [CBZ]_0 + \lim_{\Delta t \rightarrow 0} \sum_{t=0}^t \left\{ A_1 e^{\frac{-E_{A,1}}{8.314 \times T}} [ISB_i] [HOCN_i] - \frac{[U_1 + U_2][CBZ_i]}{V} \right\} \Delta t$$

$$S5) [ISB] = [ISB]_0 + \lim_{\Delta t \rightarrow 0} \sum_{t=0}^t \left\{ -A_1 e^{\frac{-E_{A,1}}{8.314 \times T}} [ISB_i] [HOCN_i] + \frac{[U_1][ISB_{inlet}]}{V} - \frac{[U_1 + U_2][ISB_i]}{V} \right\} \Delta t$$

$$S6) [KOCN] = [KOCN]_0 + \lim_{\Delta t \rightarrow 0} \sum_{t=0}^t \left\{ -A_1 e^{\frac{-E_{A,1}}{8.314 \times T}} [ISB_i] [HOCN_i] - A_2 e^{\frac{-E_{A,2}}{8.314 \times T}} [HOCN_i] + \frac{[U_2][KOCN_{inlet}]}{V} - \frac{[U_1 + U_2][KOCN_i]}{V} \right\} \Delta t$$

## Raman Spectra used for Peak Assignment

**Figure S2:** Raman Spectra Used for Peak Assignment

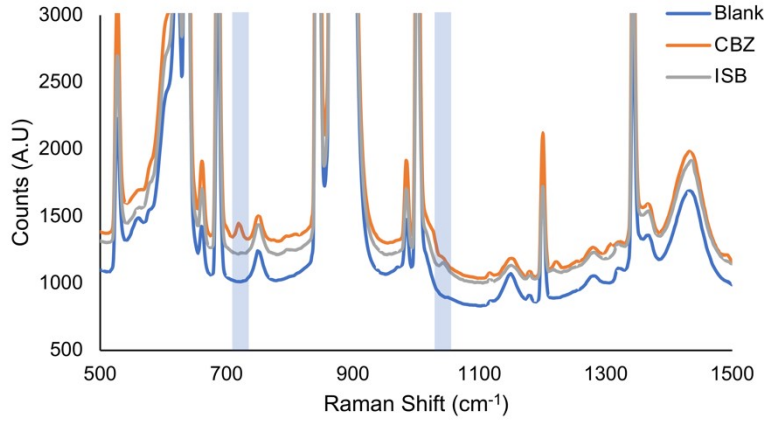

Supplement: d2re00476c1.pdf [file d2re00476c1.pdf]
